# Supplementary material for: An R2R3-Type Transcription Factor OsMYBAS1 Regulates Seed Germination under Artificial Accelerated Aging in Transgenic Rice (Oryza sativa L.)
Source: MDPI journal article supplement (doi:10.3390/agronomy12081955), 2022-08-19
Supplement: s1 [file s1]

**Table S1.** The primer for qRT-PCR

| Gene ID               | Primer (5'-3')           | Tm(°C) |
|-----------------------|--------------------------|--------|
| <i>LOC_Os02g26430</i> | F: CGACAAGCCGCCACCAAT    | 60.0   |
|                       | R: CCGTACTTGCGCCACGAATAG | 65.1   |
| <i>LOC_Os04g14680</i> | F: GGAGTACATGGCGGAGGT    | 56.8   |
|                       | R: GCGGGAACCTGATGGAG     | 52.8   |
| <i>LOC_Os03g03910</i> | F: TCGCTCAAGCCCAACCC     | 58.7   |
|                       | R: AGCCGTCCATGTGGCGGTAG  | 66.1   |
| <i>LOC_Os11g02530</i> | F: GACAACGCCAAGCCTCT     | 58.8   |
|                       | R: TGGTGCAGGTCTTCTCG     | 58.8   |
| <i>LOC_Os03g32220</i> | F: ATCCAGGGCAGAGCAGC     | 54.0   |
|                       | R: GAGGGAGACGTAGTCATCGTG | 57.3   |
| <i>LOC_Os01g40260</i> | F: CTCGCTGCTGCTTCCTT     | 54.3   |
|                       | R: GATTCAGGTCGCCTTGGT    | 53.8   |
| <i>LOC_Os02g42870</i> | F: TACATCCAGGCCAACGG     | 52.9   |
|                       | R: TGGACGATGGACTTCTGCT   | 52.5   |

Table S2 Depict of GO functional and KEGG enrichment analysis

| ID         | Description                                   |
|------------|-----------------------------------------------|
| GO:0005975 | Carbohydrate metabolic process                |
| GO:0006629 | Lipid metabolic process                       |
| GO:0030001 | Metal ion transport                           |
| GO:0007018 | Microtubule-based movement                    |
| GO:0043401 | Steroid hormone mediated signaling pathway    |
| GO:0071383 | Cellular response to steroid hormone stimulus |
| GO:0006284 | Base-excision repair                          |
| GO:0019953 | Sexual reproduction                           |
| GO:0007275 | Multicellular organism development            |
| GO:0010051 | Xylem and phloem pattern formation            |
| GO:0015979 | Photosynthesis                                |
| GO:0042744 | Hydrogen peroxide catabolic process           |
| GO:0010268 | Brassinosteroid homeostasis                   |
| GO:0006857 | Oligopeptide transport                        |
| GO:0055114 | Oxidation-reduction process                   |
| GO:0006979 | Response to oxidative stress                  |
| GO:0009116 | Nucleoside metabolic process                  |
| GO:0005975 | Carbohydrate metabolic process                |
| GO:0006749 | Glutathione metabolic process                 |
| GO:0006629 | Lipid metabolic process                       |
| GO:0005794 | Golgi apparatus                               |
| GO:0005874 | Microtubule                                   |
| GO:0005694 | Chromosome                                    |
| GO:0008622 | Epsilon DNA polymerase complex                |
| GO:0030141 | Secretory granule                             |
| GO:0099503 | Secretory vesicle                             |
| GO:0015629 | Actin cytoskeleton                            |

|            |                                                      |
|------------|------------------------------------------------------|
| GO:0005680 | Anaphase-promoting complex                           |
| GO:0031965 | Nuclear membrane                                     |
| GO:0009986 | Cell surface                                         |
| GO:0009654 | Photosystem II oxygen evolving complex               |
| GO:0016021 | Integral component of membrane                       |
| GO:0009535 | Chloroplast thylakoid membrane                       |
| GO:0009538 | Photosystem I reaction center                        |
| GO:0009505 | Plant-type cell wall                                 |
| GO:0042788 | Polysomal ribosome                                   |
| GO:0005854 | Nascent polypeptide-associated complex               |
| GO:0000145 | Exocyst                                              |
| GO:0009523 | Photosystem II                                       |
| GO:0030173 | Integral component of Golgi membrane                 |
| GO:0005524 | ATP binding                                          |
| GO:0008017 | microtubule binding                                  |
| GO:0004553 | hydrolase activity, hydrolyzing O-glycosyl compounds |
| GO:0016757 | transferase activity, transferring glycosyl groups   |
| GO:0051539 | 4 iron, 4 sulfur cluster binding                     |
| GO:0003777 | microtubule motor activity                           |
| GO:0016491 | oxidoreductase activity                              |
| GO:0003924 | GTPase activity                                      |
| GO:0000287 | magnesium ion binding                                |
| GO:0003688 | DNA replication origin binding                       |
| GO:0016491 | oxidoreductase activity                              |
| GO:0020037 | heme binding                                         |
| GO:0004497 | monooxygenase activity                               |
| GO:0022857 | transmembrane transporter activity                   |
| GO:0005506 | iron ion binding                                     |

|            |                                  |
|------------|----------------------------------|
| GO:0051213 | dioxygenase activity             |
| GO:0008194 | UDP-glycosyltransferase activity |
| GO:0004601 | peroxidase activity              |
| GO:0071949 | FAD binding                      |
| GO:0009055 | electron carrier activity        |

---

| ID      | Description                                         |
|---------|-----------------------------------------------------|
| ko00561 | Glycerolipid metabolism                             |
| ko03410 | Base excision repair                                |
| ko00564 | Glycerophospholipid metabolism                      |
| ko03030 | DNA replication                                     |
| ko00270 | Cysteine and methionine metabolism                  |
| ko00500 | Starch and sucrose metabolism                       |
| ko00051 | Fructose and mannose metabolism                     |
| ko00710 | Carbon fixation in photosynthetic organisms         |
| ko04120 | Ubiquitin mediated proteolysis                      |
| ko03430 | Mismatch repair                                     |
| ko00940 | Phenylpropanoid biosynthesis                        |
| ko00906 | Carotenoid biosynthesis                             |
| ko00630 | Glyoxylate and dicarboxylate metabolism             |
| ko00941 | Flavonoid biosynthesis                              |
| ko00480 | Glutathione metabolism                              |
| ko01200 | Carbon metabolism                                   |
| ko00130 | Ubiquinone and other terpenoid-quinone biosynthesis |
| ko00195 | Photosynthesis                                      |
| ko04016 | MAPK signaling pathway - plant                      |
| ko00010 | Glycolysis/Gluconeogenesis                          |

**Table S3.** Downstream transcription factors of OsMYBAS1

| Gene ID               | transcription factor family |
|-----------------------|-----------------------------|
| <i>LOC_Os01g40260</i> | WRKY                        |
| <i>LOC_Os01g16810</i> | MYB                         |
| <i>LOC_Os01g36220</i> | bZIP                        |
| <i>LOC_Os02g26430</i> | WRKY                        |
| <i>LOC_Os02g42870</i> | MYB                         |
| <i>LOC_Os03g12760</i> | bHLH                        |
| <i>LOC_Os03g32220</i> | C2H2                        |
| <i>LOC_Os06g08440</i> | ARR-B                       |
| <i>LOC_Os09g06464</i> | CO-like                     |
| <i>LOC_Os11g02530</i> | WRKY                        |
| <i>LOC_Os12g04200</i> | GRAS                        |
